# Supplementary material for: Association of RXR-Gamma Gene Variants with Familial Combined Hyperlipidemia: Genotype and Haplotype Analysis
Source: J Lipids. 2013 Oct 13;2013:517943. doi: 10.1155/2013/517943 (PMC3810489; doi:10.1155/2013/517943)
Supplement: Supplementary file 1 — Supplementary Table 1 shows the five genotyped SNPs of the RXR-gamma gene and their minor allele frequencies (MAF) in our controls. [file 517943.f1.pdf]

**Supplementary Table 1. Genotyped SNPs of the RXR-gamma gene and their minor allele frequencies (MAF) in our controls in comparison with those reported in the NCBI database**

| Ref SNP ID | Location      | Sequence Variation | Codon variation | MAF (our controls) |
|------------|---------------|--------------------|-----------------|--------------------|
| Rs1128977  | Exon 3        | C/T                | Ala140Ala       | 0.38               |
| Rs2651860  | Intron 4      | T/G                | none            | 0.46               |
| Rs2134095  | Exon8         | T/C                | Val350Val       | 0.25               |
| Rs283696   | Intron 9      | G/A                | none            | 0.22               |
| Rs10918169 | Exon 10 3'UTR | G/C†               | none            | 0.76               |

† Our data reported G-allele as the less frequent allele
